# Supplementary material for: 3D periodic composite nanopatterns with superior mechanical properties: the effect of nanoparticles on pattern contrast and mechanical properties
Source: Royal Society of Chemistry journal article supplement (doi:10.1039/c4ra04934a), 2014-07-25
Supplement: c4ra04934a1.pdf [file c4ra04934a1.pdf]

# 3D Periodic Composite Nanopatterns with Superior Mechanical Properties: The Effect of Nanoparticles on Pattern Contrast and Mechanical Properties

*Da-Young Kang and Jun Hyuk Moon\**

Department of Chemical and Biomolecular Engineering, Sogang University, Seoul, Korea

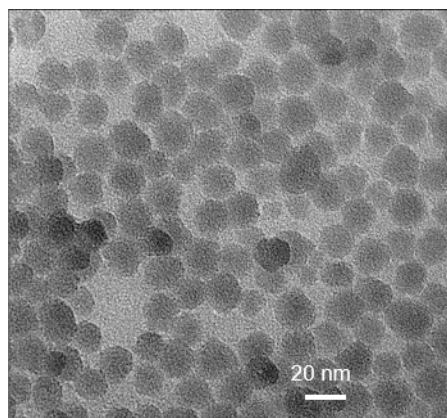

Figure S1. TEM image of silica nanoparticles.
